# Supplementary material
Source: publisher figshare collection journal article supplement (https://future-science-group.figshare.com/ndownloader/files/31016635)
Supplement: Supplementary file 1 [file 31016635]

### Supplementary 3

#### Kinetic curve of maize root hydrotropic response

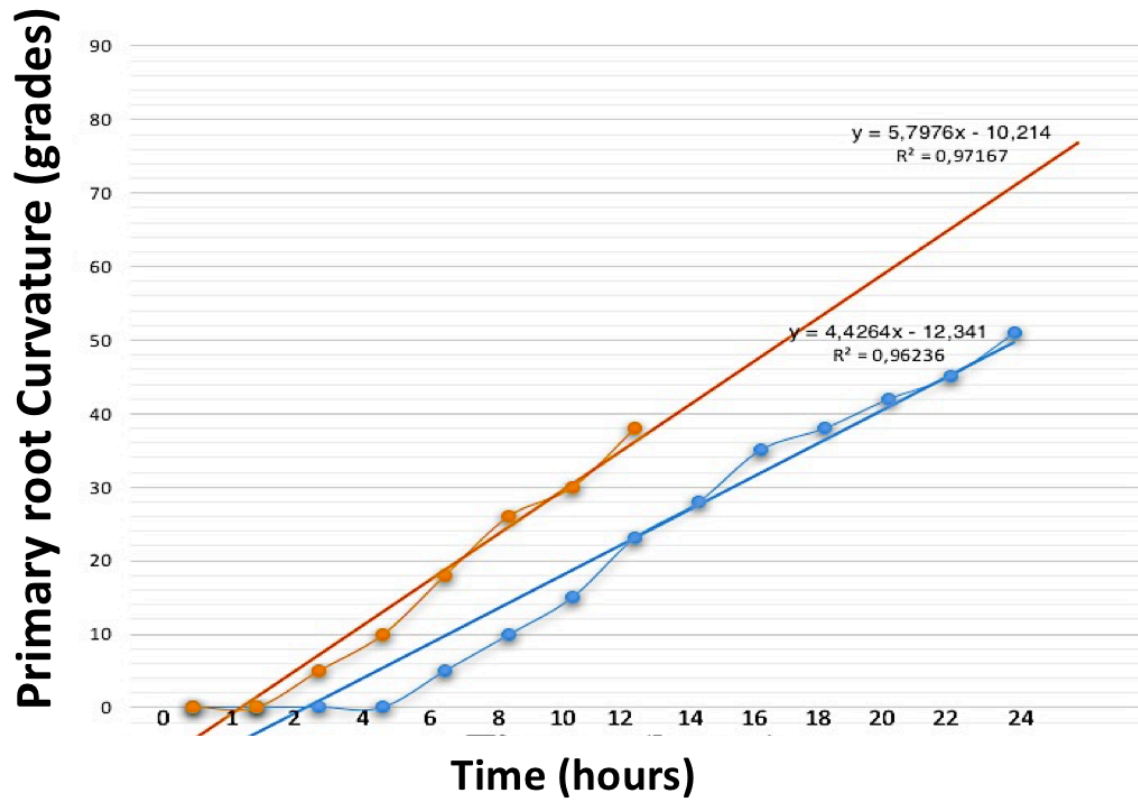

**Kinetic curves of the primary root hydrotropic response.** Graphs of curvatures angles (degrees) during 24 h (measured hourly) on *Arabidopsis thaliana* L. Antoni et al (2006) and *Zea mays* L. (DTMA 183 maize hybrid) under two different assay systems. Solid red line: linear behavior of the *A. thaliana* L (R: 0.97) and solid blue line: linear behavior of the DTMA 181 maize hybrid (R: 0.96)
